# Supplementary material
Source: ML conference proceedings conference paper supplement (https://proceedings.neurips.cc/paper_files/paper/2022/hash/0850e04a62e0f3407780852581c5fcf4-Abstract.html)
Supplement: Supplementary file 1 [file 0850e04a62e0f3407780852581c5fcf4-Supplemental-Conference.zip]

Archive with 2 entries (2 files):
- neurips_2022_985_appendix.pdf
- __MACOSX/._neurips_2022_985_appendix.pdf
